# Supplementary material
Source: Springer Nature journal article supplement (https://www.springermedizin.de/resource/supplementary/12885_2007_1075_MOESM5_ESM.pdf/9471042)

### SIR and local clusters

### Smoothed RR

a. Both sexes

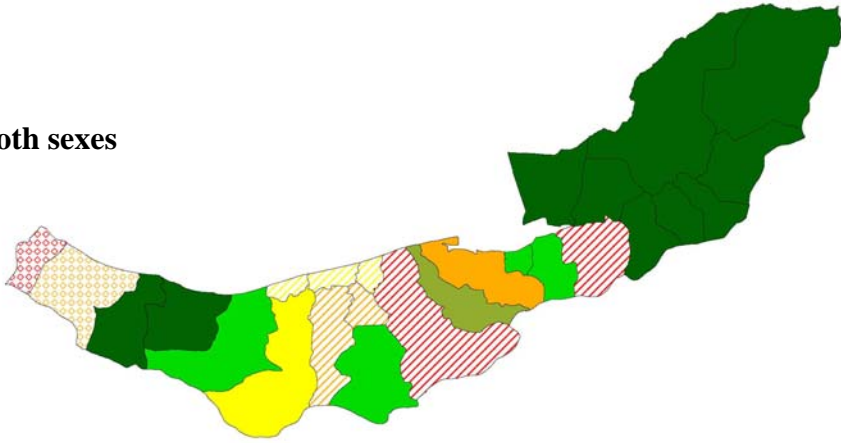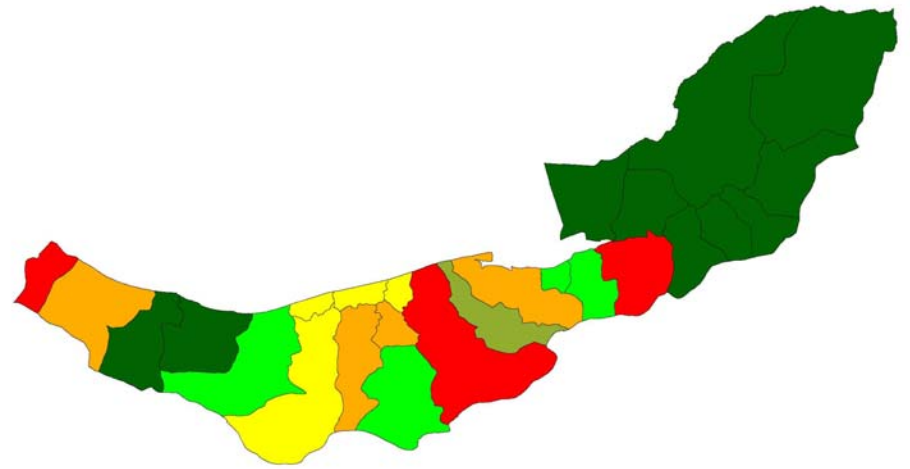

b. Female

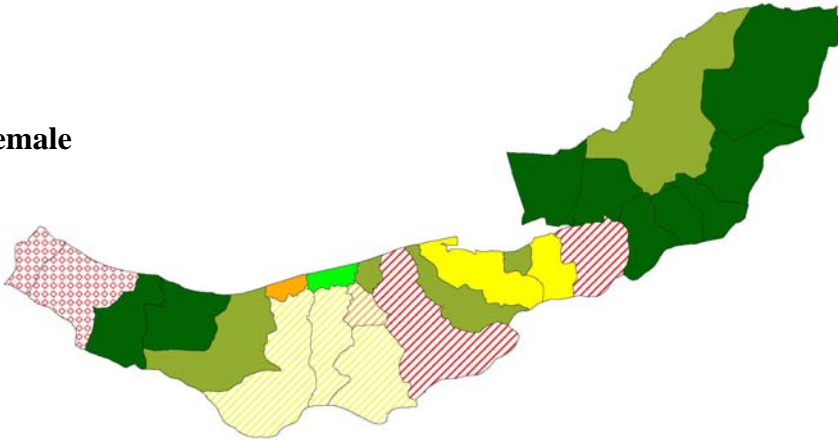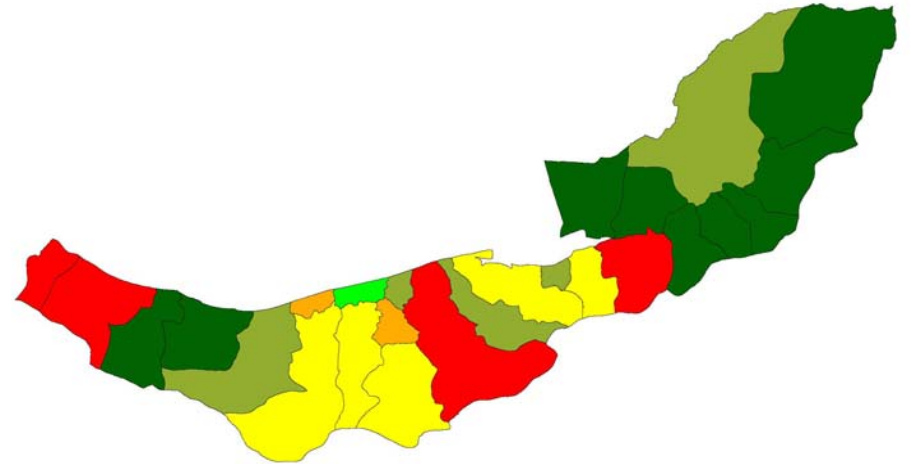

c. Male

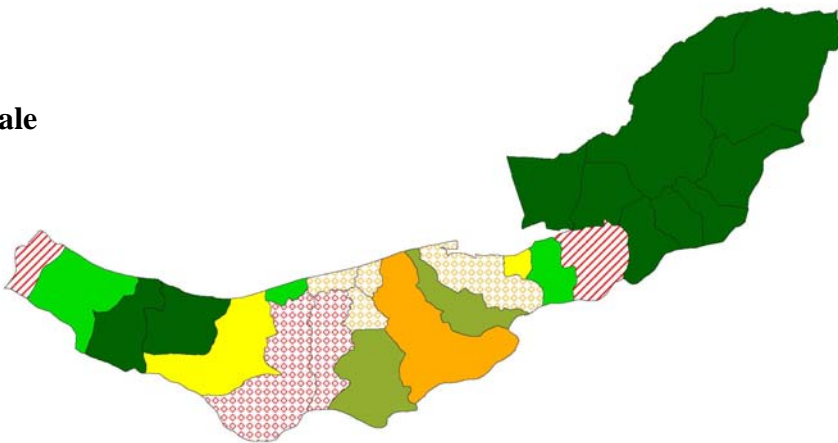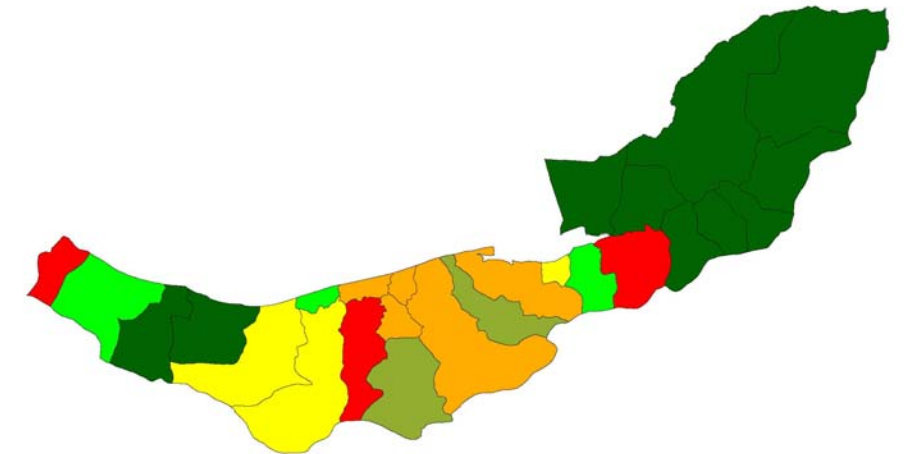

Supplement: MOESM5 [file 9471042]
